# Supplementary material for: Evaluation of the daytime tropospheric loss of 2-methylbutanal
Source: Copernicus journal article supplement (doi:10.5194/acp-2021-758), 2021-09-14
Supplement: Supplementary file [file acp-2021-758-AC2-supplement.pdf]

We thank the Reviewer for the comments and suggestions made that will increase the quality of this work.

*Overall, I find the UV absorption cross-sections and kinetic OH and Cl kinetic rate coefficients to be of high quality, useful for atmospheric research and appropriate for publication in the ACP journal. However, the product study analysis and reporting of SOA formation I find to be less useful, and in need of additional refinement if they are to be included in the main document. This manuscript reports a tremendous amount of work. However, more is not always better, and the paper would increase its impact potential if it were focus more on the results with higher certainty.*

**Authors' reply:** As we discussed in the replies below, the purpose of the product study was to see if the degradation of 2MB initiated by reaction with Cl and by UV solar radiation may form secondary pollutants even more harmful than the primary one. The yield of SOA formed in the Cl-reaction of 2MB is too small (less than 0.8%) to potentially affect human health. For that reason and following the Reviewer's suggestion, we will move section 3.3.3 to the SI in the revised version of the manuscript. In terms of the gas-phase products, under the experimental conditions of our smog chamber experiments, the present results may not be generally applicable to the real atmosphere, as pointed out by the Reviewer, since the  $\text{RO}_2 + \text{RO}_2$  reactions are expected to be more important in our work than  $\text{RO}_2 + \text{HO}_2$  chemistry which dominates in non-polluted atmospheres. Nevertheless, the end-products in a real atmosphere coming from  $\text{HO}_2$  chemistry would be the same as those observed in our experiments. For that reason, the discussion on the degradation mechanism of 2MB was kept short in the original manuscript and the detailed mechanism was included in the SI. We also agree to include more information about the  $\text{HO}_2$  chemistry in the revised SI and will revise the conclusions of this work to make clear that our conditions are not the same as in a real atmosphere.

### Reply to general comments

*Photolysis mechanism: more focus on this aspect could strengthen the paper. Simple calculations of the energetics of the possible decomposition pathways for atmospherically relevant photons may be helpful. Providing additional information to support the branching ratio constraints would be helpful.*

**Authors' reply:** With the collaboration of Prof. Lucía Santos (University of Castilla-La Mancha), we have performed calculations at the BHandLYP/ 6-311++G\*\* level, similarly to what Castañeda et al. (J. Mex. Chem. Soc. 2012, 56(3), 316-324) did for aliphatic aldehydes, to obtain  $\Delta G^0$  at 298 K and the  $\lambda_{\text{threshold}}$  for the three photolysis channels of 2MB.

The obtained results are summarized in the following table:

| Channel | Photoproducts                      | $\Delta G^0_{298\text{ K}} / \text{kJ mol}^{-1}$ | $\lambda_{\text{threshold}} / \text{nm}$ |
|---------|------------------------------------|--------------------------------------------------|------------------------------------------|
| 1a      | <chem>CH3CH2CH(CH3)C(O) + H</chem> | 326.1                                            | 367.1                                    |
| 1b      | <chem>CH3CH2CH(CH3) + HC(O)</chem> | 358.3                                            | 334.1                                    |
| 1c      | <chem>CH3CH2CH2CH3 + CO</chem>     | -53.2                                            |                                          |

From the energetics of these reactions, it can be inferred that all channels are feasible in the troposphere, where the available UV radiation has a minimum wavelength of 290nm. From the thermodynamic point of view, the branching ratios cannot be calculated since kinetics plays a crucial role. Kinetic calculations, although possible, require more computational time than the thermodynamic calculations presented here and are out of the scope of this paper.

*For example, the band used for quantification of butane (C-H stretch) overlaps highly with the precursor and likely, many products. Given this, how well is butane actually quantified? Is butane quantified by other methods?*

**Authors' reply:** We agree with the Referee that it is hard to directly obtain reliable results when several IR bands overlap in the spectrum. To minimize that interference, the subtraction procedure of the final spectrum was:

- 1) Subtraction of the IR features from the unreacted 2MB, focusing on the  $2700\text{ cm}^{-1}$  and  $2800\text{ cm}^{-1}$  bands.

- 2) Once 2MB was subtracted, the IR features of butanone were subtracted, focusing on the C=O stretching band at  $1750\text{ cm}^{-1}$ .
- 3) Finally, the IR features of butane were subtracted of the resulting spectrum, focusing on the  $2800\text{--}3000\text{ cm}^{-1}$  band.

In all steps, we always looked to the whole spectrum, not only to the selected bands, to be sure that the subtraction was properly done. So, the subtraction procedure led us confidence in the quantification of butane by FTIR spectroscopy. We will clarify this in revised manuscript.

Butane could not be detected by GC-MS because it was not absorbed on the SMPE fibre that was used to collect the sample. It cannot be detected by PTR-ToF-MS either, because the proton affinity of butane ( $153.7\text{ kcal/mol}$  (Estebes et al.; J. Phys. Chem. A 2000, 104, 26, 6233–6240)) is lower than that of water ( $165.3\text{ kcal/mol}$  (NIST)). This makes that the ionization of butane by reaction with  $\text{H}_3\text{O}^+$ , in which this technique is based, is not possible.

*It would be useful to include a figure of the photolysis lamp spectrum in the SI.*

**Authors' reply:** In the revised SI, the spectrum of the solar simulator will be included as Figure S2. This spectrum was measured by a spectroradiometer (Ocean Optics, model USB2000+) working with a CC-3-DA cosine corrector. The same figure will include the reference spectrum AM 1.5G of the Sun, corrected with the intensity measured in our experiments.

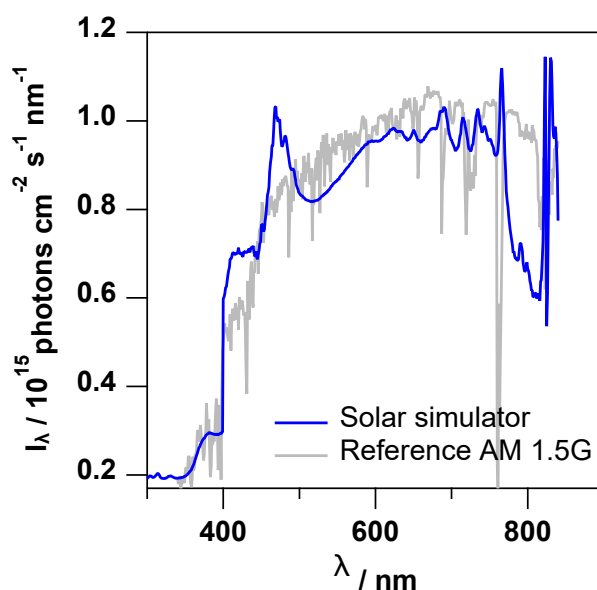

**Figure S2:** Irradiance spectrum of the ABA class solar simulator used in this work compared with the solar reference spectrum AM 1.5G, corrected with the intensity measured in this work.

*Product studies: The approach to product analysis described in the paper appears to assume RO<sub>2</sub>+RO<sub>2</sub> radical chemistry. To the extent this is true, the results derived from these experiments may not be generally applicable to the atmosphere, where RO<sub>2</sub> reactions with NO and with HO<sub>2</sub> often dominate RO<sub>2</sub> reactivity. However, it is also often true in systems where primary RO<sub>2</sub> production greatly exceeds other primary radical production (eg, HO<sub>2</sub> and NO), that HO<sub>2</sub> chemistry remains important (due to substantial HO<sub>2</sub> generation from initial RO<sub>2</sub> + RO<sub>2</sub> reactions).*

**Authors' reply:** There is no NO<sub>x</sub> in our chamber during our experiments, so the Reviewer is right: the chemistry of peroxy (RO<sub>2</sub>) radicals dominates the mechanism under the established conditions. We are aware that, in most locations, the chemistry involving NO<sub>x</sub> is of great importance, but in this paper, we wanted to look at the mechanism under NO<sub>x</sub>-free conditions, which we believe that is still of interest in non-polluted areas.

We agree with the reviewer that primary RO<sub>2</sub> concentration greatly exceeds HO<sub>2</sub> radicals in our system. HO<sub>2</sub> radicals are formed in reactions such as RO + O<sub>2</sub>, and their concentration may be substantially lower than that for RO<sub>2</sub>, similarly to what observed in other experimental setups (for example, Rissanen et al., J. Am. Chem. Soc. 2014, 136, 15596–15606). Although we did not mention it in the manuscript, we checked the role of the RO<sub>2</sub>+HO<sub>2</sub> reactions in the formation of identified reaction products. General reaction channels for a RO<sub>2</sub>+HO<sub>2</sub> reaction are:

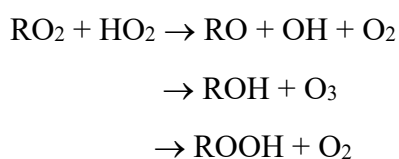

For example, when R=CH<sub>3</sub>CH<sub>2</sub>CH(CH<sub>3</sub>)C(O), which is formed both in photolysis (channel R1a) and in the Cl reaction (channel R3b), the corresponding ROH, CH<sub>3</sub>CH<sub>2</sub>CH(CH<sub>3</sub>)C(O)OH was detected by PTR-ToF-MS and GC-MS, although found to be a negligible product, and the corresponding ROOH, CH<sub>3</sub>CH<sub>2</sub>CH(CH<sub>3</sub>)C(O)OOH, was not detected with any of the techniques used in this work.

*HO<sub>2</sub> + RO<sub>2</sub> reactions often produce ROOH in high yield. What would be the fate of ROOH in your experimental system. Would ROOH decompose and be detected at other*

*products in this system/instrumentation.*

**Authors' reply:** According to several reviews (Jackson & Hewitt, Crit. Rev. Environ. Sci. Technol. 1999, 29:2, 175-228; Lee et al., Atmos. Environ. 2000, 34(21), 3475-3494) the possible pathways for destruction of ROOH in the atmosphere include photolysis, reaction with OH, or loss by physical deposition to the ground. In our chamber, the most likely fate of ROOH would probably be its reaction with Cl atoms. For example, the reaction channel for CH<sub>3</sub>CH<sub>2</sub>CH(CH<sub>3</sub>)C(O)OOH, similarly to the OH-reaction, is expected to be:

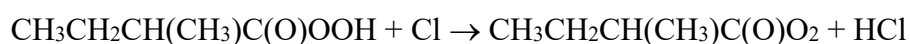

Photolysis in our chamber is also likely, although according to Kleinman (J. Geophys. Res. 1986, 91, 10889–10904), it is a slower process than Cl-reaction:

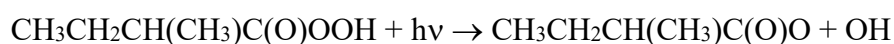

The CH<sub>3</sub>CH<sub>2</sub>CH(CH<sub>3</sub>)C(O)O<sub>2</sub> and CH<sub>3</sub>CH<sub>2</sub>CH(CH<sub>3</sub>)C(O)O radicals that can be formed after the CH<sub>3</sub>CH<sub>2</sub>CH(CH<sub>3</sub>)C(O)OOH degradation are already present in our mechanism through the RO<sub>2</sub> + RO<sub>2</sub> route.

For any other ROOH in the mechanism, RO and RO<sub>2</sub> radicals are expected to be formed too, which yield the same products as explained in the mechanism proposed in the original manuscript by the RO<sub>2</sub> + RO<sub>2</sub> routes.

To avoid an overload of the depicted mechanism, we will change the “+RO<sub>2</sub>” label in the mechanisms by “+RO<sub>2</sub> or HO<sub>2</sub>” to include the channel in the RO<sub>2</sub> + HO<sub>2</sub> reaction in which RO radical is formed, and a short sentence will be added to the figure caption to include the possibility of ROOH formation and its fate.

*Can ROOH be specifically detected with the applied instrumentation?*

**Authors' reply:** PTR-ToF-MS can detect peroxides if their lifetime is high enough to reach the reaction chamber of the instrument. For example, Warneke et al. (J. Atmos. Chem. 2001, 38, 167–185) detected hydroxy-isoprene-hydroperoxides with a PTR-MS. In our study, the most probable ROOH's, according to the proposed reaction mechanism, i.e. CH<sub>3</sub>CH<sub>2</sub>CH(CH<sub>3</sub>)C(O)OOH and CH<sub>3</sub>CH<sub>2</sub>CH(CH<sub>3</sub>)OOH, have been searched among the generated products by PTR-ToF-MS, which is the most sensitive analytical technique that we used. However, the expected ions C<sub>5</sub>H<sub>10</sub>O<sub>3</sub>H<sup>+</sup> and C<sub>4</sub>H<sub>10</sub>O<sub>2</sub>H<sup>+</sup>, corresponding to CH<sub>3</sub>CH<sub>2</sub>CH(CH<sub>3</sub>)C(O)OOH and CH<sub>3</sub>CH<sub>2</sub>CH(CH<sub>3</sub>)OOH, were not detected at m/z= 119 and 91, respectively.

*What is the RO<sub>2</sub> lifetime in these experiments? What is the potential for autoxidation (RO<sub>2</sub> H-shift) within the reaction chambers? Within the atmosphere? Suggest these questions should be discussed and clarified in the manuscript.*

**Authors' reply:** With our smog chambers, since we cannot detect radicals, we are not able to determine the RO<sub>2</sub> lifetime. As discussed in replies above, RO<sub>2</sub> degradation pathways in the atmosphere might be reactions with NO, HO<sub>2</sub>, and RO<sub>2</sub>. In real atmospheres, the RO<sub>2</sub> + RO<sub>2</sub> reactions are slower than the RO<sub>2</sub> + HO<sub>2</sub> and RO<sub>2</sub> + NO reactions, but, in our system, the dominating radical is RO<sub>2</sub> since NO was not added to the mixture and HO<sub>2</sub> requires a more complicated chemistry than RO<sub>2</sub> to be formed. So, in our chamber, where RO<sub>2</sub> chemistry might be dominating, RO<sub>2</sub> lifetime will probably be longer than in real atmosphere.

The RO<sub>2</sub> autoxidation consists of an intramolecular H-abstraction or a H-shift, that generates an alkyl radical, R, that has a hydroperoxyl functional group (-OOH). This alkyl radical can even further react with O<sub>2</sub> to produce a new RO<sub>2</sub> radical. In the case of the RO<sub>2</sub> radicals formed in the Cl reaction of 2MB, the most likely H atom that can be shifted is the one of the aldehydic group, similarly to what was observed in one of the RO<sub>2</sub> radicals formed in the OH+methacrolein reaction (Crounse et al., J. Phys. Chem. A 2012, 116, 5756–5762). For example, in the Cl+2MB reaction, the RO<sub>2</sub> radical formed in channel R3b can be autoxidized to:

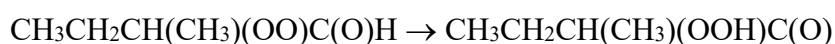

The CH<sub>3</sub>CH<sub>2</sub>CH(CH<sub>3</sub>)(OOH)C(O) radical can decompose, as proposed by Crounse et al., to form butanone, CO and OH radicals:

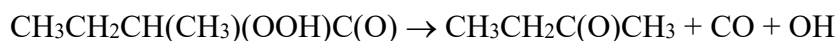

Then, detected butanone and CO can also be formed through this pathway. They were already included among the products observed through channel R3b, in the RO<sub>2</sub> + RO<sub>2</sub> reactions. Therefore, the inclusion of the RO<sub>2</sub> autoxidation in this channel in our mechanism will not change the conclusions of the manuscript. However, with the techniques used in this work, since we cannot detect RO<sub>2</sub> radicals, it is not possible to differentiate if the observed products are generated by the RO<sub>2</sub> + RO<sub>2</sub> reaction or by autoxidation.

*A simple kinetic simulation of the chemistry occurring within reaction chambers may be highly useful for a better understanding of the RO<sub>2</sub> chemistry in these experiments.*

**Authors' reply:** The chemistry occurring within the reaction chamber, as depicted in the reaction mechanism presented in the manuscript, is very complex and involves a great number of reactions. A *simple* kinetic simulation would not be accurate enough to understand the RO<sub>2</sub> chemistry since, as far as we know, the rate coefficients for reactions involving most of the RO<sub>2</sub> formed in this work, like CH<sub>3</sub>CH<sub>2</sub>CH(CH<sub>3</sub>)C(O)O<sub>2</sub>, CH<sub>3</sub>CH<sub>2</sub>CH(CH<sub>3</sub>)O<sub>2</sub>, or CH<sub>3</sub>CH<sub>2</sub>C(CH<sub>3</sub>)(O<sub>2</sub>)C(O)H, are still unknown.

*SOA studies: Related to the comment above – to be useful for modeling the atmospheric fate of these species, SOA formation needs to be quantified for well-known conditions (including, RO<sub>2</sub> fate [fraction reacting with RO<sub>2</sub>, HO<sub>2</sub>, and NO] and RO<sub>2</sub> lifetime [can autoxidation be important, RO<sub>2</sub> H-shift]) which relate to those found in the atmosphere. Differences in these pathways can substantially alter the formation of SOA, and as such, at a minimum one needs to carefully describe the experimental RO<sub>2</sub> fate when reporting an SOA yield.*

**Authors' reply:** We agree with the Referee that it is important to know the specific conditions at which the SOA yield is quantified. In this case, we only know for sure what the initial concentrations of 2MB and Cl<sub>2</sub> in the chamber are. As explained above, none of our instruments can detect the presence of species like the RO<sub>2</sub> radicals. We understand that our results are of limited use in models that try to reproduce the behaviour of 2-methylbutanal in the atmosphere, but the aim of this work was to show that the SOA formation in its Cl reaction is possible, although in a very low extent.

*The quantification of particulate matter is a challenge, even, in large chambers, requiring careful correction for size dependent wall-loss, and correction for vapor-particle-wall partitioning of semi-volatile species. If these corrections have been done here this should be described in more detail.*

**Authors' reply:** Corrections were done to account for the loss of particles and gaseous 2MB onto the reactor walls. Since this was already described in one of our previous works (Antiñolo et al., Atmos. Environ. 219, 117041, 2019), we

decided to skip this part to focus on the results of this work.

The experimental aerosol mass ( $M_t$ ) was corrected to obtain  $M_{SOA}$  by means of the following equation, in which  $t$  is the time after the Cl reaction started:

$$M_{SOA} = M_t(1 + k_{SOA \text{ loss}} t) \quad (1)$$

The concentration of reacted 2MB,  $\Delta[2MB]$ , at every reaction time  $t$  was calculated using the following equation:

$$\Delta[2MB] = [2MB]_{0, \text{corrected}} - [2MB]_t \quad (2)$$

where  $[2MB]_t$  is the concentration at a given time of 2MB and  $[2MB]_{0, \text{corrected}}$  is defined as the initial concentration corrected with the wall loss:

$$[2MB]_{0, \text{corrected}} = [2MB]_0 \exp(-k_{2MB \text{ loss}} t) \quad (3)$$

where  $[2MB]_0$  is the initial concentration introduced in the chamber.

*The fact that early nucleation occurs is interesting. It may be more fruitful to shift focus to this, describing potential mechanisms, and whether these may have atmospheric significance.*

**Authors' reply:** The SOA formation can be explained through a simple mechanism proposed by Kroll et al. (2007), and shown in Figure A, in which, after the oxidation of the parent VOC, a semi-volatile species is formed in the gas phase,  $A_g$ . This gas-phase species can undergo two different processes: partitioning to the particle phase,  $A_p$  (and subsequent reaction in the particle phase to form  $B_p$ ) or reaction to form other gas-phase species (X). If the partition to the particle phase is more important, there will be a very short induction period to generate SOA. Unfortunately, the gas-particle partition equilibrium constant,  $K_p$ , that can determinate in what extent partition to the particle phase is important, and that can be determined through the Odum et al. equation could not be determined in this work because, after *ca.* 12-30 minutes, the formed particles were too big ( $D_p > 0.52 \mu m$ ) to be detected by our FMPS spectrometer.



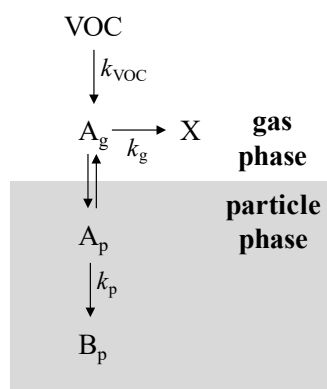

Figure A. Mechanism for SOA formation from a single semi-volatile species  $\text{A}_g$  proposed by Kroll et al. (2007).

*It may be helpful to add a Table to the SI for yields of the more certain products from photolysis and Cl from each quantification method.*

**Authors' reply:** We will add the table below to the SI as suggested by the Reviewer, so the presentation of the results can be more easily understood. It will be included as Table S3.

**Table S3.** Summary of the product yields obtained in this work.

| <b>Cl reaction</b>         |                         |                  |
|----------------------------|-------------------------|------------------|
| <b>Compound</b>            | <b>Detection method</b> | <b>Yield / %</b> |
| Butanone                   | FTIR                    | $49.3 \pm 0.8$   |
|                            | PTR-ToF-MS              | $32.4 \pm 0.2$   |
| Acetaldehyde               | FTIR                    | -                |
|                            | PTR-ToF-MS              | $58.4 \pm 0.2$   |
| Methylglyoxal              | FTIR                    | -                |
|                            | PTR-ToF-MS              | $13.5 \pm 0.2$   |
| <b>Photolysis reaction</b> |                         |                  |
| <b>Compound</b>            | <b>Detection method</b> | <b>Yield / %</b> |
| Butane                     | FTIR                    | $9.80 \pm 0.31$  |
| Butanone                   | FTIR                    | $14.8 \pm 0.5$   |

*While not obtrusive to the point of obscuring understanding, the sentence structure could be improved in several places to improve clarity and readability (e.g. LN62-63, LN113-114)*

**Authors' reply:** Some sentences have been rephrased in the revised manuscript following the Reviewer's suggestion.

**Reply to specific comments**

*LN14: for Cl rate coefficient should be ' $\times 10^{-10}$ '?*

**Authors' reply:** This typo will be corrected in the revised manuscript.

*LN31: I'm not familiar with O<sub>3</sub> reactions with saturated aldehydes. Could you include more description and references? NO<sub>3</sub> radical is known to react with aldehydes, thru aldehydic-H abstraction. Might be useful to mention this in overview.*

**Authors' reply:** Generally, only the reaction of O<sub>3</sub> with unsaturated compounds is fast enough to be important since the favoured mechanism is the O<sub>3</sub> addition to the double bond. In fact, O<sub>3</sub> reaction of saturated aldehydes were reported to be extremely slow ( $<10^{-20}$  cm<sup>3</sup> molecule<sup>-1</sup> s<sup>-1</sup> at 298 K), and, therefore, of negligible importance in the atmosphere, by Atkinson and Carter (Chem. Rev. 1984, 84, 5, 437–470). We will include a mention to this in the revised manuscript.

On the other hand, NO<sub>3</sub> reaction of 2-methylbutanal is quite important in the atmosphere at night, with a rate coefficient of  $(2.56 \pm 0.49) 10^{-14}$  cm<sup>3</sup> molecule<sup>-1</sup> s<sup>-1</sup> (Cabañas et al., Phys. Chem. Chem. Phys., 5, 112-116, 2003). However, the aim of this work was to discuss the **diurnal** degradation of 2-methylbutanal.

*LN67: It would be useful to state the composition of diluent gas (and other places in manuscript)*

**Authors' reply:** The diluent gas used in this mixture was synthetic air (AirLiquide, 99.999 %), that contains 20% O<sub>2</sub>,  $\leq 1$  ppm CO,  $\leq 1$  ppm CO<sub>2</sub>,  $\leq 3$  ppm H<sub>2</sub>O,  $\leq 0.1$  ppm C<sub>n</sub>H<sub>m</sub>, and the rest is N<sub>2</sub>.

We will add to the manuscript the subsection 2.4. Chemicals, in which we will give details, not only of the diluent gas, but of other chemicals used in this work.

*LN85-98: Often, as a result of chemistry following radical formation from initial photon excitation, additional oxidants can be formed (eg, OH/HO<sub>2</sub>) either directly or from*

*photolysis of resulting products. These oxidants can also contribute to the loss of the starting material. Were any efforts made to constrain the impact such chemistry may have on these results?*

**Authors' reply:** An experiment of photolysis of 2MB was done in the presence of cyclohexane ( $[\text{cyclohexane}]/[\text{2MB}] = 8.2$ ) which is widely used as OH radical scavenger in this kind of experiments. The photolysis quantum yield obtained in the presence of cyclohexane ( $\Phi_{\text{cyclohexane}} = 0.29 \pm 0.02$ ) showed no difference when compared with the reported in the manuscript ( $\Phi_{\text{eff}} = 0.30 \pm 0.05$ ), indicating that the chemistry of other oxidants is negligible. This will be added in the revised manuscript.

*LN94: insert 'large' before 'surface'?*

**Authors' reply:** We will make this change following the Referee's advice.

*LN115-139: It would be useful to state the volume (or gas residence time) of the LIF setup*

**Authors' reply:** The gas residence time in the LIF reactor varies depending on the total gas flow, pressure, and temperature. Considering the geometry of the reactor, in our experiments, the residence time ranges from 0.8 to 1.1 seconds (at 353 and 263 K, respectively) at 50 Torr of total pressure, from 4.9 to 6.6 seconds (at 353 and 263 K, respectively) at 300 Torr of total pressure, and from 9.8 to 13.2 seconds (at 353 and 263 K, respectively) at 600 Torr of total pressure. In the revised manuscript, the following sentence will be added: "The residence time in the cell ranged between 0.8 and 13 s, depending on the flow, pressure and temperature conditions of the experiment".

*LN177-188: It would be good to explicitly specify the diluent gas, reaction pressure, and temperature.*

**Authors' reply:** The Referee is right, the diluent gas (synthetic air) and the P,T conditions of the experiments (760 Torr and 298 K) were not stated in Section 2.3.2, as they are the same as in the kinetics. All this information was given in the previous section. However, to make it clearer, we will include it again in the

product study for the Cl reaction.

*LN239-241: It may be clearer to write this section for wavelength region used for the photolysis expts (>290nm?). Are all three channels listed here accessible under these photon energies? DeltaG estimate?*

**Authors' reply:** We agree with the Reviewer that it is clearer if we state that photolysis occurs at  $\lambda \geq 290\text{nm}$  instead at  $\lambda = 220\text{-}360\text{ nm}$ , as previously written in the original manuscript. This change will be made in the revised version.

$\Delta G_{298\text{ K}}^0$  were calculated, as explained above, and the three channels are accessible at  $\lambda \geq 290\text{nm}$ .

*LN249-250: Can you discuss this further? Why is the CO yield dependent on initial MB? This is may be telling you something worth digging into.*

**Authors' reply:** There are several studies that observed changes in product yields when changing experimental conditions like relative humidity, temperature or concentration of reactants. For example, in the Friedman and Farmer paper (Atmos. Environ. 2018,187, 335-345), they observed that the yields of the organic acids formed during the OH reaction of monoterpenes changed as a function of [OH]. Their explanation was that, when their concentration is higher, OH radicals oxidized further the acids, causing a decrease in their yield. In our case, this explanation is not valid since we observed that the CO yield is increased when the initial concentration of 2MB is lower. Looking more carefully to the graphs from which  $Y_{\text{CO}}$  are determined in this work (see Figure B below), it can be observed that the maximum [CO] generated in the experiments is very similar, and the only thing that changes is the amount of 2MB reacted. This indicates that CO is coming from a process that takes place independently of the initial 2MB, and the most probable process occurring in our photolysis cell is CO generation from the walls. This probable origin of CO will be included in the revised manuscript.

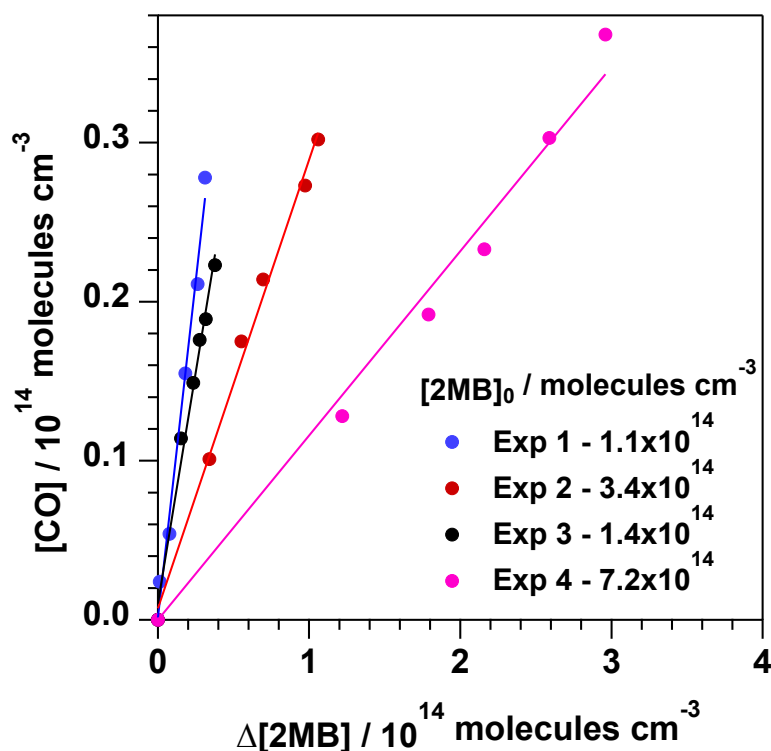

Figure B. Plots from which  $Y_{CO}$  were determined in this work.

LN270-275: Can butane also be measured by the PTRMS or GC-MS? If so, it would be worthwhile to describe these results, as they would lend confidence to the FTIR quantification of butane.

**Authors' reply:** Unfortunately, butane could not be detected neither by GC-MS or PTR-ToF-MS, as described above. Therefore, its quantification was only possible by FTIR.

Fig7: Is that CO<sub>2</sub> initial and 50 min spectra? Is this understood? Seems like there is also H<sub>2</sub>O in the residual spectra? Is this understood? Can impact of OH chemistry in the CI expts be quantified using this?

**Authors' reply:** The presence of unexpected CO<sub>2</sub> and H<sub>2</sub>O in our initial FTIR spectra is due to the fact that the FTIR spectrometer is not purged with N<sub>2</sub> and there are changes in the CO<sub>2</sub> and H<sub>2</sub>O concentration in the lab that can affect the recorded spectra. In addition, the background spectrum, that can remove the CO<sub>2</sub> and H<sub>2</sub>O features, was recorded at the beginning of a series of measurements that includes dark reactions and photolysis tests. For the initial spectrum in Fig. 7, the

background was, at least, 90 min old.

*LN350-363 & Fig8: More discussion of how PTR signals for acetald and 2MB were deconvoluted is needed.*

**Authors' reply:** 2MB is ionized in our PTR-ToF-MS into two different ions:  $C_5H_{10}OH^+$  and  $C_2H_4OH^+$ . The  $C_2H_4OH^+$  ion is formed also by acetaldehyde, so the signal due to 2MB and the signal due to acetaldehyde had to be separated to correctly quantify 2MB from the  $C_2H_4OH^+$  ion. The way we managed to do this was very simple. First, only 2MB was present in the sample, so the  $C_2H_4OH^+$  ion was only coming from 2MB, and it was possible to establish the amount of the  $C_2H_4OH^+$  and  $C_5H_{10}OH^+$  ions (61% and 39%, respectively), and the ratio between them (1.56). When the reaction started, it was possible to calculate the concentration of the  $C_2H_4OH^+$  ion due to 2MB ( $[C_2H_4OH^+]_{2MB}$ ) considering the  $C_5H_{10}OH^+$  ion and its relationship with the  $C_2H_4OH^+$  ion:

$$[C_2H_4OH^+]_{2MB} = 1.56 [C_5H_{10}OH^+]$$

Once  $[C_2H_4OH^+]_{2MB}$  was known, it was subtracted from the total concentration of the  $C_2H_4OH^+$  ion ( $[C_2H_4OH^+]_{Total}$ ) to determine the concentration of acetaldehyde ( $[CH_3C(O)H]$ ):

$$[CH_3C(O)H] = [C_2H_4OH^+]_{Total} - [C_2H_4OH^+]_{2MB}$$

*Also, there should be some explanation for how PTR calibrations were conducted.*

**Authors' reply:** The products were quantified by using the transmission calibration of the instrument, so the software converts the signal into concentration. This transmission calibration was performed by using a standard gas mixture: TO-14A Aromatics Mix (14 components) (Scott/Air Liquide).

*LN396: 'J' --> 'H' ?*

**Authors' reply:** This typo will be corrected in the revised manuscript.

*LN431: Probably more realistic to assume [Cl] scales with sun (J(MB)?) and then scale to constraint (1.3e5)? This will impact discussion LN448-449.*

**Authors' reply:** We agree with the Reviewer that  $[Cl]_{peak}$  concentration is not

realistic for the whole day, and that is why we stated in the manuscript that its contribution should be considered as an upper limit. Moreover, we considered the same concentration at the end of the day, when the  $[Cl]$  concentration is known to be much lower. For the first hours of the day,  $[Cl]_{peak}$  could probably work fine, but the impact is surprisingly (and erroneously) high after 18:00. As far as we know, there is no hourly measurements of  $[Cl]$  in Valencia (Spain) or a similar location. That makes hard to provide an accurate hourly contribution of Cl atoms to the loss of 2MB. From 20:00 h, obviously solar radiation, that can generate both Cl atoms and OH radicals, is less intense. Therefore, we will remove the relative contributions of OH, Cl, photolysis at 20:00 and 22:00 in Figure 9. Anyways, we will keep them for the rest of the day, taking into account that, even using  $[Cl]_{peak}$ , the major tropospheric route for the homogeneous loss of 2MB is the OH-reaction. Figure 9 will be replaced by this one:

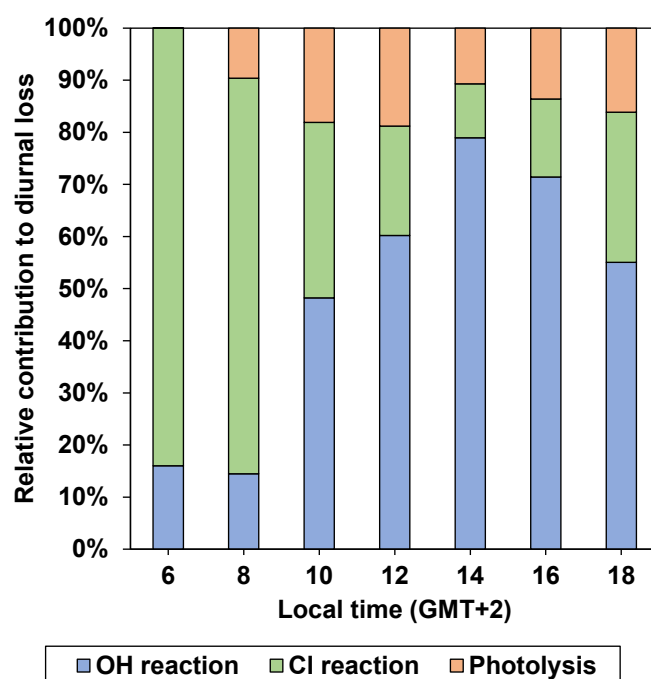

**Figure 9.** Relative contribution of the three removal routes studied in this work to the total diurnal loss.

*LN447-452: It would be useful to report the daily integrated loss pathways considered here for this (ie over day fraction 2MB lost to OH, Cl, photolysis).*

**Authors' reply:** Following the Referee's suggestion, we will include in the revised manuscript the estimation of the tropospheric lifetime considering the average concentrations in 24 h of OH and Cl, and averaged values of the solar

spectral actinic flux for 24 h in Valencia. Considering 24 h-average values of [OH] ( $1 \times 10^6$  radicals  $\text{cm}^{-3}$ , Krol et al., (1998)), [Cl] ( $1 \times 10^3$  atoms  $\text{cm}^{-3}$ , Singh et al. (1996)), and  $F(\lambda, z, \theta)$  for Valencia in June,  $\tau$  can be estimated as 7.5 h for a 24 h-period, with a relative contribution of 73% of the OH-reaction, 27% of photolysis, and less than 1% of the Cl-reaction.

*Fig S1: State if units are log10 or loge A.*

**Authors' reply:** Although the UV absorbance measured by the instrument is defined in base 10, the UV absorption cross sections are usually expressed in base e. For that reason, the absorbance in the UV region is expressed in base e throughout the manuscript. This will be clarified in the revised manuscript.

*Table S1: State more precisely the wavelength intervals used. Eg. 1-nm integrated intervals with midpoint wavelength listed in table?*

**Authors' reply:** The  $\sigma_\lambda$  values presented in Table S1 are those determined at the stated wavelength. They are not integrated  $\sigma_\lambda$ , but absolute values. The spectral resolution of the spectrograph was higher than 0.11 nm, but in Table S1  $\sigma_\lambda$  were listed every 1 nm for ease of presentation. We will include an excel file with all determined  $\sigma_\lambda$  between 220 and 360 nm in the SI. This has been clarified in the text of the main manuscript and in the Table S1 heading.

*Fig S6: There seems to be some issues with x-axis alignment on this figure. Suggest these should either be perfectly aligned (ie automatically, using plotting program) or the numbers for each x-axis should be retained. For example, butane and acetaldehyde ticks to not line up with others (butane C-H band should be aligned with that of butanol). Are there CO2 bands in some of these spectra (eg butanone, acetald., butanol, and MGLX)? Also H2O in methylglyoxal? If so, probably worthwhile to point out these as impurities, not considered in fitting.*

**Authors' reply:** The misalignment in x-axis of Fig S6 has been solved.

Reviewer is right that there are CO<sub>2</sub> and H<sub>2</sub>O impurities in some of the spectra. The presence of these atmospheric gases was discussed in a aforementioned reply. For methylglyoxal, note that this spectrum was taken from the EUROCHAMP database (Ródenas, 2017), not recorded in our lab. Thus, we do not know the



reason for the presence of H<sub>2</sub>O and CO<sub>2</sub> in that spectrum. This will be mentioned in the caption of this figure in the revised version of the SI. This figure has been changed to:

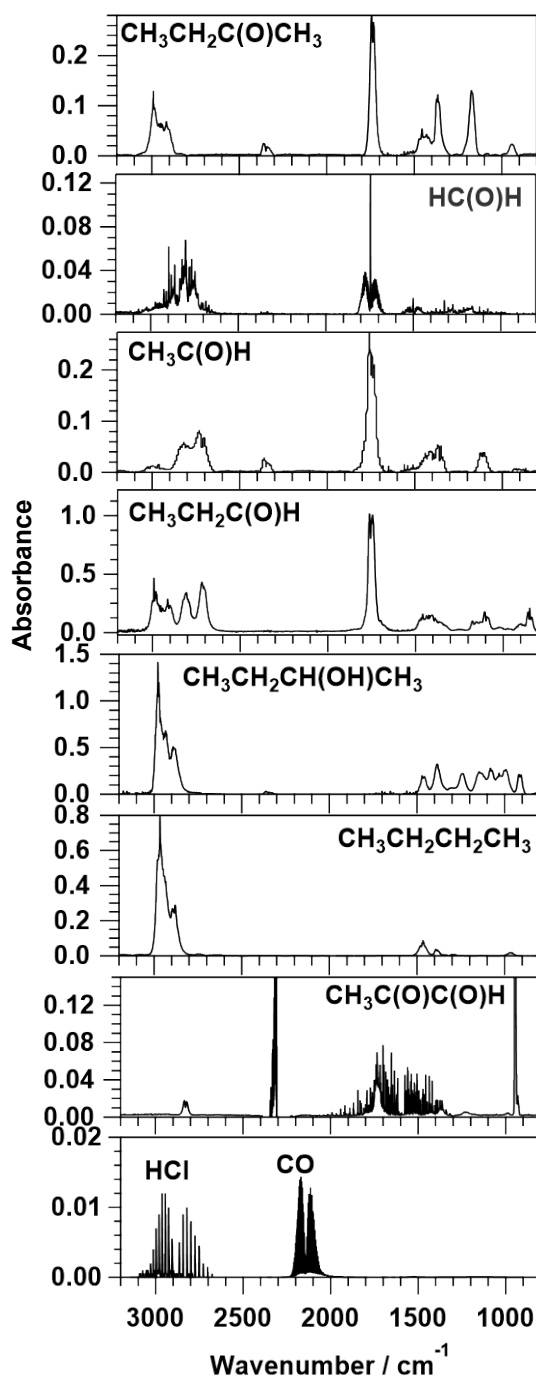

**Figure S6:** FTIR spectra reference used in this work. Butanone, formaldehyde, acetaldehyde, propanal, and butanol spectra were recorded in our lab. Butane spectrum was taken from the NIST FTIR database (Linstrom and Mallard, 2018), and methylglyoxal spectrum was taken from the EUROCHAMP database (Ródenas, 2017). CO<sub>2</sub> and H<sub>2</sub>O are present as impurities in some of these spectra and were not considered.
